# Supplementary material
Source: ML conference proceedings conference paper supplement (https://openreview.net/forum?id=WQHj907qSI)
Supplement: supplementary_material [file CODA_supplementary.pdf › CODA_supplementary.pdf]

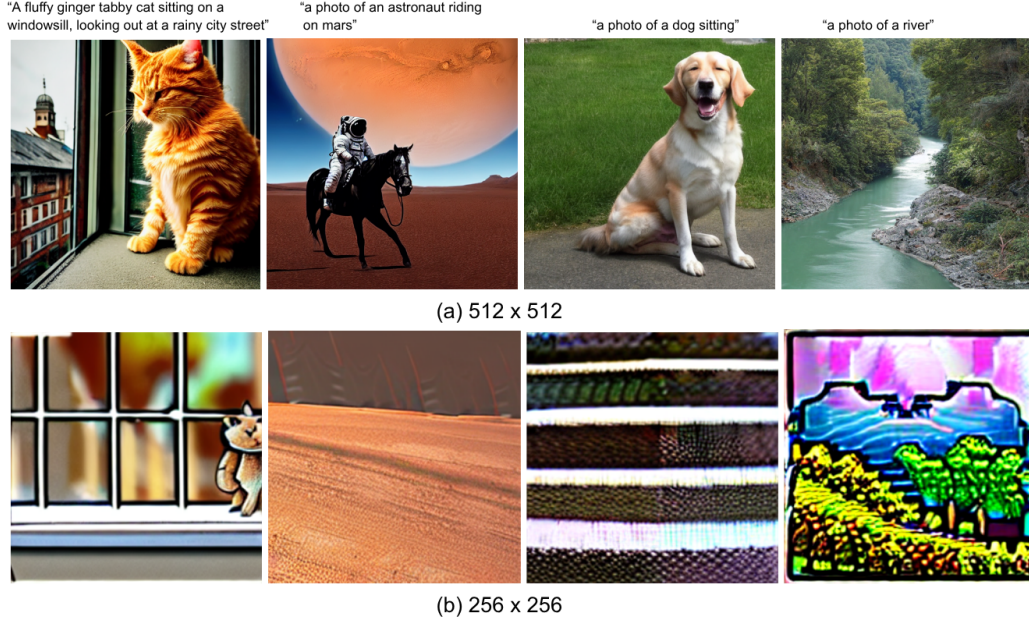

Figure 1: Image generation with pretrained Stable Diffusion 1.5 at two output resolutions: (a) 512x512 and (b) 256x256. Images in each column are generated with the same prompt and random seed. Since Stable Diffusion 1.5 is optimized for  $512 \times 512$ , **reducing the resolution to  $256 \times 256$  noticeably degrades image quality.**

Table 1: Unsupervised object segmentation results on real-world datasets. We report CODA under two image resolutions  $256 \times 256$  and  $512 \times 512$ . On VOC, CODA still achieves the best performance among slot-based diffusion methods. On COCO, it attains the highest FG-ARI and is only worse than SlotAdapt on the remaining metrics.

| VOC                      | FG-ARI $\uparrow$ | mBO $^i\uparrow$ | mBO $^c\uparrow$ | mIoU $^i\uparrow$ | mIoU $^c\uparrow$ |
|--------------------------|-------------------|------------------|------------------|-------------------|-------------------|
| SlotDiffusion $^\dagger$ | 17.8              | 50.4             | 55.3             | 44.9              | 49.3              |
| SlotAdapt                | 29.6              | 51.5             | 51.9             | -                 | -                 |
| CODA (256 $\times$ 256)  | <b>33.23</b>      | <b>54.28</b>     | <b>56.81</b>     | <b>50.00</b>      | <b>52.84</b>      |
| CODA (512 $\times$ 512)  | 32.23             | 55.38            | 61.32            | 50.77             | 56.30             |

  

| COCO                     | FG-ARI $\uparrow$ | mBO $^i\uparrow$ | mBO $^c\uparrow$ | mIoU $^i\uparrow$ | mIoU $^c\uparrow$ |
|--------------------------|-------------------|------------------|------------------|-------------------|-------------------|
| SlotDiffusion $^\dagger$ | 37.2              | 31.0             | 35.0             | 31.2              | 36.5              |
| Stable-LSD               | 35.0              | 30.4             | -                | -                 | -                 |
| SlotAdapt                | 41.4              | <b>35.1</b>      | <b>39.2</b>      | <b>36.1</b>       | <b>41.4</b>       |
| CODA (256 $\times$ 256)  | <b>46.33</b>      | 32.42            | 35.81            | 32.16             | 36.79             |
| CODA (512 $\times$ 512)  | 47.54             | 36.61            | 41.43            | 36.41             | 42.60             |
